# Supplementary material
Source: PubMed Central journal article supplement (PMC4383704)
Supplement: NIHMS663786-supplement-2.pdf [file NIHMS663786-supplement-2.pdf]

## SUPPLEMENTAL DATA

### Methods

#### **K<sub>i</sub> Calculation**

6.2 nM of uPA was incubated with various concentrations of Fab (0 -2μM) in assay buffer at room temperature for at least 5 hours to assure steady-state behavior of the system. The activity of uPA was measured for each inhibitor concentration by addition of various concentration of substrate (3.9 μM - 500 μM). The initial reaction velocity was monitored by reading the absorbance at 405 nm.

The apparent Michaelis constants value ( $K_{m_{app}}$ ) for each concentration of substrate was determined by fitting the data to the equation of Michaelis-Menten for competitive inhibition:

$$V_0 = (V_{max} [S]) / (K_{m_{app}} + [S])$$

Where,  $K_{m_{app}} = K_m (1 + ([I]/K_i))$

[S] is the concentration of substrate, [I] is the concentration of Fab, and  $K_m$  is the Michaelis constant for Spectrozyme® uPA under the assay conditions. The  $K_{m_{app}}$  values were then plotted against Fab concentration to obtain the  $K_i$ . All data were analyzed using Graphpad Prism version 4.0 for Windows, GraphPad Software, San Diego, CA, USA.

#### **Selectivity of U33 IgG for active uPA versus inactive uPA**

Proteins were purchased from the following vendors: human single chain uPA/pro-urokinase (American Diagnostica Inc. Cat # 107), human uPAR (R&D Systems Cat # 807-UK); human Serpin E1/PAI-1 Inhibitor (R&D Systems, Cat # 1786-PI-010).

*uPA versus pro-uPA:* With the following exceptions, the protocol described in Supplemental Figure 1 was utilized: Human pro-uPA is inactive, therefore a MUGB titration was not performed. The protein concentration provided by American Diagnostica was used to prepare a 2.8 nM solution of pro-uPA in PBS.

*uPA versus uPA complexed to uPAR:* Either 50 μL of 2.8 nM active uPA OR 50 μL of 2.8 nM uPAR in coating buffer was added to each well in a Nunc Maxisorb ELISA plate and incubated O/N at 4°C. Unbound protein was removed by hand washing wells 3x with wash buffer. Wells were incubated in 200 μL of Block Solution per well for 2 h at RT. Block Solution was removed by hand washing wells 3x with wash buffer. 50 μL of 2.8 nM active uPA was added to uPAR coated wells and incubated at RT for 1 h. Unbound protein was removed by hand washing wells 3x with wash buffer. 50 μL of U33 IgG in Block Solution was added for 1 h at RT. The highest U33 IgG concentration was 651 nM, and was decreased in two-fold increments to 5.1 nM. All subsequent steps are identical to the previously described protocol.

*uPA versus PAI-1 inhibited uPA:* Active uPA was coated to an ELISA plate and wells were blocked as previously described. 50 μL of PAI-1 in Block Solution was added for 1 h at RT. The highest PAI-1 concentration was 133 nM, and was decreased in two-fold increments to 8.3 nM. Unbound protein was removed by hand washing wells 3x with wash buffer. 50 μL of U33 IgG in Block Solution was added for 1 h at RT. The highest U33 IgG concentration was 651

nM, and was decreased in two-fold increments to 5.1 nM. All subsequent steps are identical to the previously described protocol.

#### **Dependence of U33 IgG binding on an accessible uPA active site**

Inhibitors used are H-Glu-Gly-Arg-CMK (EMD, Cat 347436) and p-Aminobenzamidine (Fluka, Catalog 06880). Buffers used are 50 mM Tris, 150 mM NaCl, 5 mM CaCl<sub>2</sub>, 0.05% Tween-20 pH=7.4 (1xTBST+Ca<sup>2+</sup>) and the wash buffer and block solution described previously.

*uPA versus uPA-CMK:* Active uPA was coated to an ELISA plate and wells were blocked as previously described. 50 µL of H-Glu-Gly-Arg-CMK in Block Solution was added for 1 h at RT. The highest CMK concentration was 7.5 mM, and was decreased in two-fold increments to 467 µM. Unbound protein was removed by hand washing wells 3x with wash buffer. 50 µL of U33 IgG in Block Solution was added for 1 h at RT. The highest U33 IgG concentration was 651 nM, and was decreased in two-fold increments to 5.1 nM. All subsequent steps are identical to previously described protocol.

*p-Aminobenzamidine displacement:* Both uPA and p-aminobenzamidine stocks were prepared in 1xTBST+Ca<sup>2+</sup>. Equal volumes of 100-µM p-aminobenzamidine AND 2 µM uPA OR buffer were combined and incubated at room temperature for 1 hour. 50 µL of the p-aminobenzamidine/uPA complex OR 50 µL of p-aminobenzamidine alone was added per well to a blacked-walled 96 well plate. 50 µL of 12 µM U33 IgG OR 50 µL of 1xTBST+Ca<sup>2+</sup> was added to wells containing the p-aminobenzamidine/uPA complex OR p-aminobenzamidine alone. The final concentrations are 25-µM p-aminobenzamidine, 500-nM uPA, and 6-µM U33 IgG. Fluorescence intensity measurements were made on a Tecan plate reader using an excitation wavelength of 325 nM and collecting emission data from 356nm-450nm.

#### **Selectivity of U33 IgG for human uPA compared to highly related serine proteases**

Proteases were purchased from the following vendors: human uPA (R&D Systems, Cat# 1310-SE), human tPA (Molecular Innovations Cat# HTPA-TC), human MTSP1 (R&D Systems Cat# 3946-SE-010), human plasmin (Haematologic Technologies, Inc. Cat# HCPM-0140), human thrombin (R&D Systems Cat# 1473-SE-010), human HGFA (R&D Systems Cat# 1514-SE-010), human hepsin (R&D Systems, Cat# 4776-SE-010), human chymotrypsin (Athens Research and Technologies Cat# 16-19-030820), human trypsin (Athens Research and Technologies Cat# 16-19-032000), mouse uPA (Molecular Innovations Cat# MUPA). The concentration of active protease was determined using the active site titrant MUGB (Knight CG. Active-site titration of peptidases. *Methods Enzymol.* 1995;248:85-101.). Antibodies used include U33 IgG (produced in-house at CytomX Therapeutics, Inc.) and peroxidase conjugated AffiniPure Anti-Human IgG, Fc fragment specific (Jackson Immuno Research, Cat. 709-035-098). Coating buffer is 1xPBS, wash buffer is 1x PBST, and block solution is 4% (w/v) milk in 1xPBST.

50 µL of 2.8 nM active protease in coating buffer were added to each well in a Nunc Maxisorb ELISA plate and incubated O/N at 4°C. Unbound protease was removed by hand washing wells 3x with wash buffer. Wells were incubated in 200 µL of Block Solution per well for 2 h at RT. Block Solution was removed by hand washing wells 3x with wash buffer. 50 µL of U33 IgG in Block Solution was added for 1 h at RT. The highest U33 IgG concentration was 651 nM, and was decreased in two-fold increments to 5.1 nM. Unbound U33 IgG was removed by hand

washing wells 6x with wash buffer. 50  $\mu$ L of 1:2000 dilution of secondary antibody in Block Solution was added for 1 h at RT. Unbound secondary antibody was removed by hand washing wells 6x with wash buffer. 100  $\mu$ L of 1-step Ultra TMB-ELISA was added and then quenched with 100  $\mu$ L of 1 M HCl. Signal was quantified by measuring A450 on plate reader.
